# Supplementary material
Source: PubMed Central journal article supplement (PMC3475246)
Supplement: supp_fj.12-206862_12-206862SuppTable1.pdf [file supp_fj.12-206862_12-206862SuppTable1.pdf]

## CD36 Level and Trafficking are Determinants of Lipolysis in Adipocytes

Dequan Zhou<sup>#</sup>, Dmitri Samovski<sup>‡</sup>, Adewole L. Okunade<sup>#</sup>, Philip D. Stahl<sup>‡</sup>,  
Nada A. Abumrad<sup>#,‡</sup> and Xiong Su<sup>#,‡</sup>

<sup>#</sup> Department of Internal Medicine, Center for Human Nutrition and <sup>‡</sup> Department of Cell Biology and Physiology, Washington University School of Medicine, St. Louis, MO, 63110

**Table S1. TAG FA composition in 3T3-L1 adipocyte and adipose tissue**

3T3-L1 adipocytes were treated with a negative control siRNA (CTL) or an siRNA recognizing CD36 (KD). Total lipids of cultured adipocytes or adipose tissues from wild type (WT) or CD36 null (Null) mice were extracted and TAG was purified by TLC. FA compositions were analyzed by quantitative GC. The results are expressed in percentages of total major FAs and represent means  $\pm$  SD.

| FA    | 3T3-L1 cells     |                  | p-value<br>CTL vs KD | Adipose tissue   |                  | p-value<br>WT vs Null |
|-------|------------------|------------------|----------------------|------------------|------------------|-----------------------|
|       | CTL (n= 3)       | KD (n= 3)        |                      | WT (n= 6)        | Null (n= 7)      |                       |
| C14:0 | 3.50 $\pm$ 0.30  | 3.41 $\pm$ 0.10  | 0.63                 | 1.28 $\pm$ 0.13  | 1.45 $\pm$ 0.21  | 0.12                  |
| C14:1 | 0.83 $\pm$ 0.16  | 1.00 $\pm$ 0.10  | 0.20                 | 0.06 $\pm$ 0.02  | 0.13 $\pm$ 0.01  | <0.01                 |
| C15:0 | 7.59 $\pm$ 1.99  | 8.84 $\pm$ 0.88  | 0.38                 | 0.20 $\pm$ 0.05  | 0.21 $\pm$ 0.05  | 0.66                  |
| C15:1 | 1.15 $\pm$ 0.49  | 1.48 $\pm$ 0.25  | 0.35                 | < 0.01           | < 0.01           |                       |
| C16:0 | 30.84 $\pm$ 3.23 | 27.54 $\pm$ 3.84 | 0.32                 | 21.43 $\pm$ 1.03 | 18.80 $\pm$ 3.20 | 0.08                  |
| C16:1 | 23.83 $\pm$ 1.64 | 28.74 $\pm$ 2.69 | 0.05                 | 4.27 $\pm$ 0.73  | 7.59 $\pm$ 0.51  | <0.01                 |
| C17:0 | 2.35 $\pm$ 0.57  | 2.02 $\pm$ 0.44  | 0.48                 | 0.23 $\pm$ 0.10  | 0.11 $\pm$ 0.05  | 0.04                  |
| C17:1 | 6.22 $\pm$ 0.34  | 6.32 $\pm$ 0.61  | 0.81                 | 0.24 $\pm$ 0.07  | 0.22 $\pm$ 0.06  | 0.70                  |
| C18:0 | 3.92 $\pm$ 1.16  | 2.05 $\pm$ 0.59  | 0.07                 | 3.71 $\pm$ 0.81  | 1.71 $\pm$ 0.73  | <0.01                 |
| C18:1 | 18.29 $\pm$ 1.55 | 17.46 $\pm$ 0.27 | 0.41                 | 28.84 $\pm$ 2.04 | 29.72 $\pm$ 3.21 | 0.56                  |
| C18:2 | 1.40 $\pm$ 0.19  | 1.09 $\pm$ 0.14  | 0.07                 | 31.49 $\pm$ 2.87 | 32.02 $\pm$ 4.91 | 0.81                  |
| C20:0 | 0.10 $\pm$ 0.03  | 0.07 $\pm$ 0.02  | 0.17                 | 0.76 $\pm$ 0.14  | 0.30 $\pm$ 0.06  | <0.01                 |
